# Supplementary material
Source: Research Square preprint supplement (doi:10.21203/rs.3.rs-10045541/v1)
Supplement: Supplementary file 1 [file 1e317ec99dda04d0b2fba5c6.docx]

**Supplementary File 1. Semi-Structured Interview Guide**

Main interview question:

"What managerial and organizational factors influence power relinquishment among nursing managers?"

Examples of probing questions used when clarification was needed:

- Could you explain this in more detail?
- Can you provide an example?
- What factors contributed to this situation?
- Why do you think this occurred?
- Could you elaborate further on this point?
